# Supplementary material for: An oxygen pumping anode for electrowinning aluminium
Source: Royal Society of Chemistry journal article supplement (doi:10.1039/c3cp44171g), 2013-01-01
Supplement: c3cp44171g.pdf [file c3cp44171g.pdf]

# Electronic Supplementary Information

## An Oxygen Pumping Anode for Electrowinning Aluminium

*Changqing Liu,<sup>a</sup> Xiaobo Ji,<sup>a\*</sup> Pingmin Zhang,<sup>a</sup> Qiyuan Chen,<sup>a</sup> and Craig E Banks<sup>b\*</sup>*

*Key Laboratory of Resources Chemistry of Nonferrous Metals, Ministry of Education, College of  
Chemistry and Chemical Engineering, Central South University, Changsha 410083, China  
Division of Chemistry and Materials, Manchester Metropolitan University, Chester Street, Manchester  
M1 5GD, Lancs, United Kingdom*

*E-mail: [xji@csu.edu.cn](mailto:xji@csu.edu.cn), [c.banks@mmu.ac.uk](mailto:c.banks@mmu.ac.uk)*

Figure 1: XRD of the  $\text{LaMnO}_3$  powder

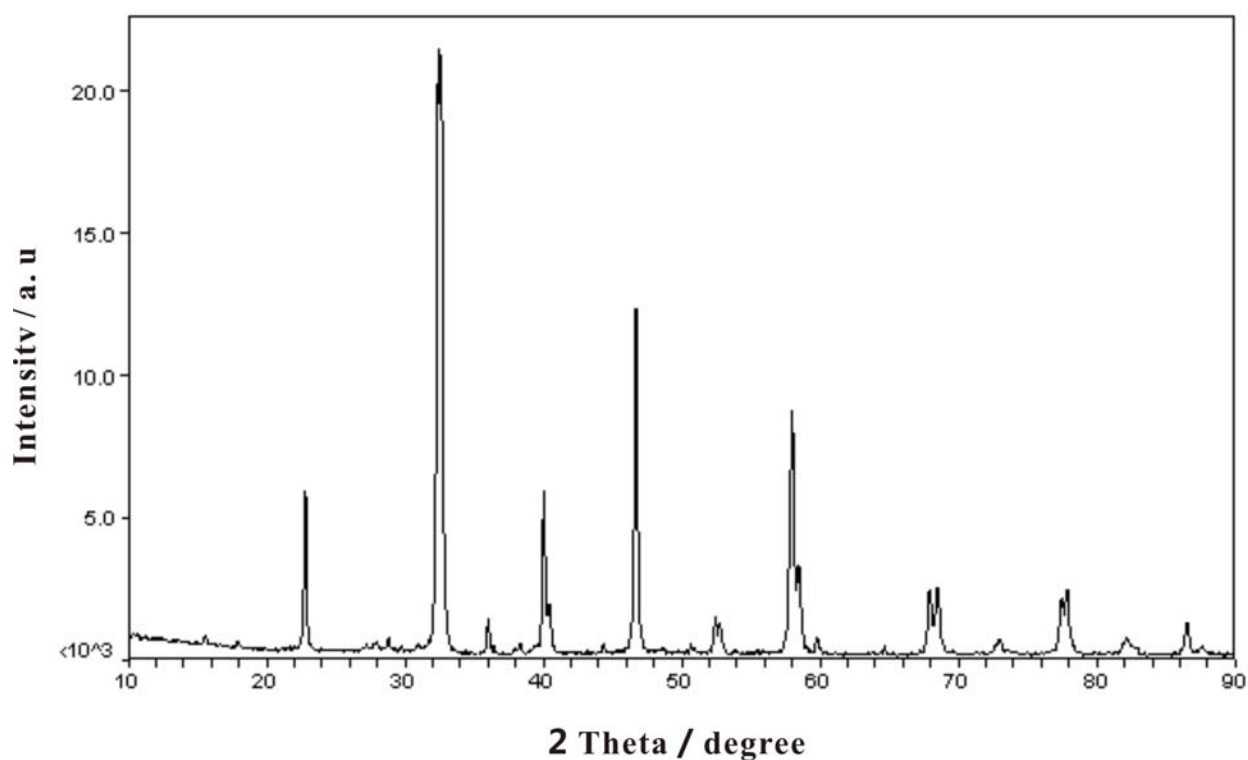

Figure 2: Diagram of the oxygen pumping anode (a) and the photograph of YSZ tube (b).

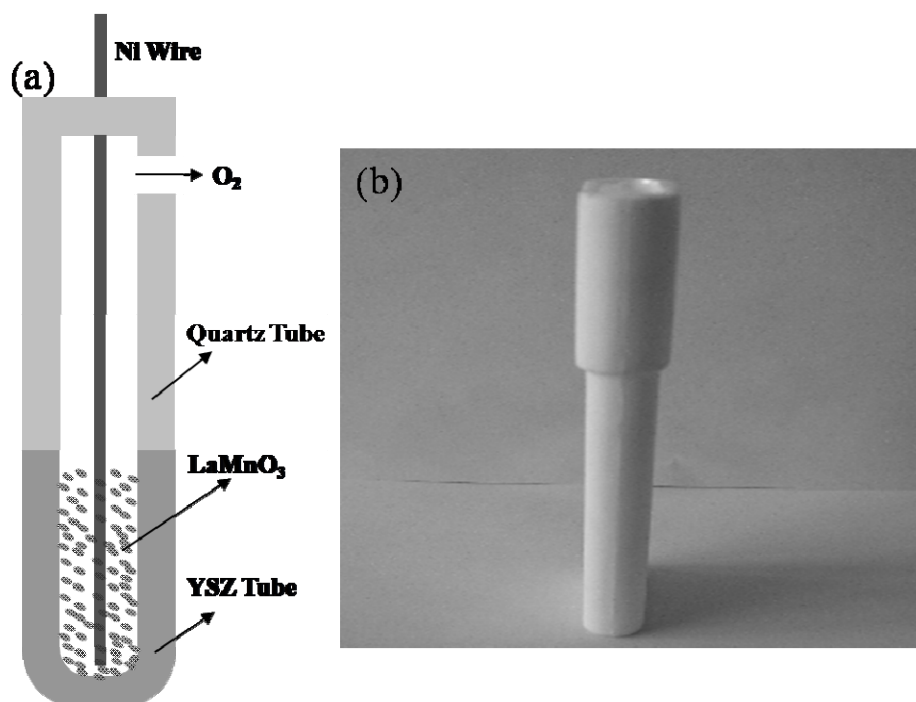

Figure 3: EDX analysis of red spots in SEM images: (a) top layer (b) 17  $\mu\text{m}$  (c) 65  $\mu\text{m}$  (d) 70  $\mu\text{m}$

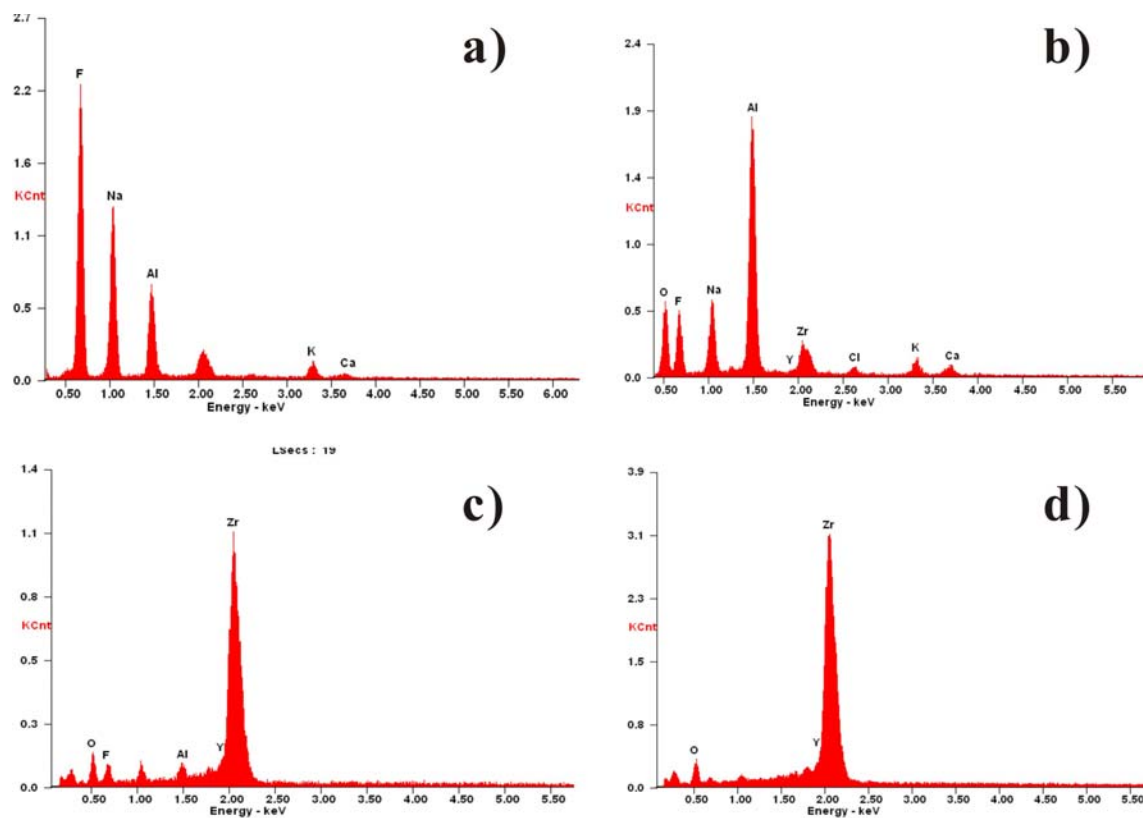

Calculation of the free energy of chemical reaction:

Table S1: All the potential chemical reactions in the electrolysis cell

|                                                                                                      |                                                                                                         |
|------------------------------------------------------------------------------------------------------|---------------------------------------------------------------------------------------------------------|
| $3\text{ZrO}_2 + 4 \text{Na}_3\text{AlF}_6 = 3\text{ZrF}_4 + 2 \text{Al}_2\text{O}_3 + 12\text{NaF}$ | $\text{Y}_2\text{O}_3 + 2 \text{Na}_3\text{AlF}_6 = 2\text{YF}_3 + \text{Al}_2\text{O}_3 + 6\text{NaF}$ |
| $3\text{ZrO}_2 + 4 \text{AlF}_3 = 3\text{ZrF}_4 + 2 \text{Al}_2\text{O}_3$                           | $\text{Y}_2\text{O}_3 + 2 \text{AlF}_3 = 2\text{YF}_3 + \text{Al}_2\text{O}_3$                          |
| $\text{ZrO}_2 + 2 \text{MgF}_2 = \text{ZrF}_4 + 2 \text{MgO}$                                        | $\text{Y}_2\text{O}_3 + 3\text{MgF}_2 = 2\text{YF}_3 + 3\text{MgO}$                                     |
| $\text{ZrO}_2 + 2 \text{CaF}_2 = \text{ZrF}_4 + 2 \text{CaO}$                                        | $\text{Y}_2\text{O}_3 + 3\text{CaF}_2 = 2\text{YF}_3 + 3\text{CaO}$                                     |
| $\text{ZrO}_2 + 4\text{LiF} = \text{ZrF}_4 + 2 \text{Li}_2\text{O}$                                  | $\text{Y}_2\text{O}_3 + 6\text{LiF} = 2\text{YF}_3 + 3\text{Li}_2\text{O}$                              |
| $3\text{ZrO}_2 + 4\text{Al} = 3\text{Zr} + 2 \text{Al}_2\text{O}_3$                                  | $\text{Y}_2\text{O}_3 + 2\text{Al} = 2\text{Y} + \text{Al}_2\text{O}_3$                                 |
| $\text{ZrO}_2 + 2\text{C} = \text{Zr} + 2\text{CO}$                                                  | $\text{Y}_2\text{O}_3 + 3\text{C} = 2\text{Y} + 3\text{CO}$                                             |
| $\text{ZrO}_2 + 4\text{NaF} = \text{ZrF}_4 + 2\text{Na}_2\text{O}$                                   | $\text{Y}_2\text{O}_3 + 6\text{NaF} = 2\text{YF}_3 + 3\text{Na}_2\text{O}$                              |

Table S2: The standard enthalpy of formation at 298 K and Gibbs free energy function at 1200K

| Chemicals                        | $-\Delta_f H_{m,298}^\ominus / \text{J}\cdot\text{mol}^{-1}$ | $\phi_T' / \text{J}\cdot\text{mol}^{-1}\cdot\text{K}^{-1}$ |
|----------------------------------|--------------------------------------------------------------|------------------------------------------------------------|
| ZrO <sub>2</sub>                 | 1097463                                                      | 93.065                                                     |
| Y <sub>2</sub> O <sub>3</sub>    | 1905394                                                      | 173.925                                                    |
| Na <sub>3</sub> AlF <sub>6</sub> | 3309544                                                      | 403.326                                                    |
| ZrF <sub>4</sub>                 | 1911251                                                      | 183.918                                                    |
| Al <sub>2</sub> O <sub>3</sub>   | 1675274                                                      | 117.084                                                    |
| NaF                              | 573626                                                       | 83.83                                                      |
| MgF <sub>2</sub>                 | 1123404                                                      | 103.311                                                    |
| LiF                              | 616931                                                       | 68.851                                                     |
| MgO                              | 601241                                                       | 55.77                                                      |
| CaF <sub>2</sub>                 | 634294                                                       | 70.894                                                     |
| GaO                              | 634294                                                       | 70.894                                                     |
| C                                | 0                                                            | 14.99                                                      |
| Al                               | 0                                                            | 48.382                                                     |
| Zr                               | 0                                                            | 57.123                                                     |
| Y                                | 0                                                            | 62.442                                                     |
| CO                               | 110541                                                       | 216.99                                                     |
| Li <sub>2</sub> O                | 166942                                                       | 264.650                                                    |
| ZrF <sub>4</sub>                 | 1911251                                                      | 183.918                                                    |
| YF <sub>3</sub>                  | 1718369                                                      | 174.083                                                    |

Table S3: The calculated free energy at 1200K

| Reactions                                                        | $\Delta G_T^\ominus$ /kJ·mol <sup>-1</sup> |
|------------------------------------------------------------------|--------------------------------------------|
| $Y_2O_3 + 2Na_3AlF_6 = 2YF_3 + Al_2O_3 + 6NaF$                   | -14.500                                    |
| $Y_2O_3 + 2AlF_3 = 2YF_3 + Al_2O_3$                              | -181.909                                   |
| $Y_2O_3 + 3MgF_2 = 2YF_3 + 3MgO$                                 | -3401.600                                  |
| $ZrO_2 + \frac{4}{3}NaAlF_6 = ZrF_4 + \frac{2}{3}Al_2O_3 + 4NaF$ | -3105.500                                  |

Table S4: Element analysis of (a) top layer

| Element | FK    | NaK   | AlK   | KK   | CaK  |
|---------|-------|-------|-------|------|------|
| Wt%     | 42.76 | 35.53 | 17.87 | 3.09 | 0.76 |
| At%     | 49.04 | 33.92 | 14.53 | 1.73 | 0.42 |

Table S5: Element analysis of (b) 17 μm

| Element | OK    | FK    | NaK   | AlK   | YL   | ZrL   | ClK  | KK   | CaK  |
|---------|-------|-------|-------|-------|------|-------|------|------|------|
| Wt%     | 20.53 | 18.74 | 12.84 | 30.97 | 0.65 | 10.27 | 1.24 | 2.88 | 1.88 |
| At%     | 30.19 | 23.20 | 13.14 | 27.00 | 0.17 | 2.65  | 0.82 | 1.73 | 1.10 |

Table S6: Element analysis of (c) 65 μm

| Element | OK    | FK    | AlK  | YL   | ZrL   |
|---------|-------|-------|------|------|-------|
| Wt%     | 16.39 | 9.49  | 1.47 | 5.44 | 67.21 |
| At%     | 43.11 | 21.01 | 2.29 | 2.58 | 31.01 |

Table S7: Element analysis of (d) 70 μm

| Element | OK    | YL   | ZrL   |
|---------|-------|------|-------|
| Wt%     | 16.33 | 5.64 | 78.03 |
| At%     | 52.63 | 3.27 | 44.10 |
